1 **The Role of Cytokines in Acute and Chronic Postsurgical Pain in Pediatric Patients after**  
2 **Major Musculoskeletal Surgeries**

3  
4 Vidya Chidambaran (MD)<sup>a</sup>, Qing Duan (PhD)<sup>b</sup>, Valentina Pilipenko (PhD)<sup>b</sup>, Susan M. Glynn  
5 (BA)<sup>a</sup>, Alyssa Sproles (BA)<sup>c</sup>, Lisa J. Martin (PhD)<sup>d</sup>, Michael J. Lacagnina (PhD)<sup>a</sup>, Christopher D.  
6 King (PhD)<sup>e</sup>, Lili Ding (PhD)<sup>b</sup>  
7

8 <sup>a</sup>Department of Anesthesiology, Cincinnati Children's Hospital Medical Center, Cincinnati, OH,  
9 USA [Vidya.Chidambaran@cchmc.org](mailto:Vidya.Chidambaran@cchmc.org), [Susan.Glynn@cchmc.org](mailto:Susan.Glynn@cchmc.org),  
10 [Michael.Lacagnina@cchmc.org](mailto:Michael.Lacagnina@cchmc.org)  
11

12 <sup>b</sup>Division of Biostatistics and Epidemiology, Department of Pediatrics, Cincinnati Children's  
13 Hospital Medical Center, Cincinnati, OH, USA [Qing.Duan@cchmc.org](mailto:Qing.Duan@cchmc.org)  
14 [Valentia.Pilipenko@cchmc.org](mailto:Valentia.Pilipenko@cchmc.org) [Lili.Ding@cchmc.org](mailto:Lili.Ding@cchmc.org)  
15

16 <sup>c</sup>Division of Rheumatology, Department of Pediatrics, Cincinnati Children's Hospital Medical  
17 Center, Cincinnati, OH, USA [Alyssa.Sproles@cchmc.org](mailto:Alyssa.Sproles@cchmc.org)  
18

19 <sup>d</sup>Division of Human Genetics, Department of Pediatrics, Cincinnati Children's Hospital Medical  
20 Center, Cincinnati, OH, USA [Lisa.Martin@cchmc.org](mailto:Lisa.Martin@cchmc.org)  
21

22 <sup>e</sup>Division of Behavioral Medicine and Clinical Psychology, Department of Pediatrics, Cincinnati  
23 Children's Hospital Medical Center, Cincinnati, OH, USA [Christopher.King@cchmc.org](mailto:Christopher.King@cchmc.org)  
24

25 **Corresponding author:**

26 Vidya Chidambaran, MD, MS  
27 Professor, Department of Anesthesia, Cincinnati Children's Hospital Medical Center  
28 3333 Burnet Avenue, Cincinnati, OH, 45229, USA  
29 Email: [vidya.chidambaran@cchmc.org](mailto:vidya.chidambaran@cchmc.org), Phone: (513) 636-4408  
30

31 **Running Title:** Cytokines in Chronic/Acute Pediatric Postsurgical Pain  
32

33 **Keywords:** Cytokines, Pediatric, Acute postsurgical pain, chronic postsurgical pain  
34

35 **Declarations of interest:** none  
36

37 **Disclosures:** Research reported in this manuscript was supported by National Institute of  
38 Arthritis and Musculoskeletal and Skin Diseases under award number 5R01AR075857  
39 (PI:Chidambaran). The content is solely the responsibility of the authors and does not necessarily  
40 represent the official views of the National Institutes of Health.  
41  
42

43

44 **Abstract**

45 **Study Objective:** To determine if baseline cytokines and their changes over postoperative days  
46 0-2 (POD0-2) predict acute and chronic postsurgical pain (CPSP) after major surgery.

47 **Design:** Prospective, observational, longitudinal nested study.

48 **Setting:** University-affiliated quaternary children's hospital.

49 **Patients:** Subjects ( $\geq 8$  years old) with idiopathic scoliosis undergoing spine fusion or pectus  
50 excavatum undergoing Nuss procedure.

51 **Measurements:** Demographics, surgical, psychosocial measures, pain scores, and opioid use  
52 over POD0-2 were collected. Cytokine concentrations were analyzed in serial blood samples  
53 collected before and after (up to two weeks) surgery, using Luminex bead arrays. After data  
54 preparation, relationships between pre- and post-surgical cytokine concentrations with acute (%  
55 time in moderate-severe pain over POD0-2) and chronic (pain score  $> 3/10$  beyond 3 months post-  
56 surgery) pain were analyzed. After adjusting for covariates, univariate/multivariate regression  
57 analyses were conducted to associate baseline cytokine concentrations with postoperative pain,  
58 and mixed effects models were used to associate longitudinal cytokine concentrations with pain  
59 outcomes.

60 **Main Results:** Analyses included 3,164 measures of 16 cytokines from 112 subjects (median  
61 age 15.3, IQR 13.5-17.0, 54.5% female, 59.8% pectus). Acute postsurgical pain was associated  
62 with higher baseline concentrations of GM-CSF ( $\beta=0.95$ , SE 0.31;  $p=.003$ ), IL-1 $\beta$  ( $\beta=0.84$ , SE  
63 0.36;  $p=.02$ ), IL-2 ( $\beta=0.78$ , SE 0.34;  $p=.03$ ), and IL-12 p70 ( $\beta=0.88$ , SE 0.40;  $p=.03$ ) and  
64 longitudinal postoperative elevations in GM-CSF ( $\beta=1.38$ , SE 0.57;  $p=.03$ ), IFN $\gamma$  ( $\beta=1.36$ , SE  
65 0.6;  $p=.03$ ), IL-1 $\beta$  ( $\beta=1.25$ , SE 0.59;  $p=.03$ ), IL-7 ( $\beta=1.65$ , SE 0.7,  $p=.02$ ), and IL-12 p70  
66 ( $\beta=1.17$ , SE 0.58;  $p=.04$ ). In contrast, CPSP was associated with lower baseline concentration of

67 IL-8 ( $\beta = -0.39$ , SE 0.17;  $p = .02$ ), and the risk of developing CPSP was elevated in patients with  
68 lower longitudinal postoperative concentrations of IL-6 ( $\beta = -0.57$ , SE 0.26;  $p = .03$ ), IL-8 ( $\beta = -$   
69 0.68, SE 0.24;  $p = .006$ ), and IL-13 ( $\beta = -0.48$ , SE 0.22;  $p = .03$ ). Furthermore, higher odds for  
70 CPSP were found for females (vs. males) for IL-2, IL-4, IL-5, IL-6, IL-8, IL-10, and TNF $\alpha$ , and  
71 for pectus (vs. spine) surgery for IL-8 and IL-10.

72 **Conclusion:** We identified pro-inflammatory cytokines associated with increased acute  
73 postoperative pain and anti-inflammatory cytokines associated with lower CPSP risk, with  
74 potential to serve as predictive and prognostic biomarkers.

75

76

77 **1. Introduction**

78

79 Major musculoskeletal surgeries are often accompanied by acute postsurgical pain, which  
80 can have deleterious effects on long-term function and recovery, leading to chronic postsurgical  
81 pain (CPSP). Pectus excavatum repair and spine deformity correction surgery are two such  
82 painful surgeries adolescents undergo and are associated with extensive dissection, muscle  
83 derangements, inflammation, nerve sensitization [1] and CPSP [2, 3]. Surgeries are often  
84 associated with a host of immune responses following tissue injury and incision [4]. These  
85 include the release of cytokines, stress responses and acute phase proteins, which can be harmful  
86 when excessive. [5] At the same time, these responses are the body's defense against infection  
87 and tissue damage, and their release can be protective. Thus, a simple anti-inflammatory strategy  
88 for example with Non-steroidal Anti-inflammatory Drugs raises concerns regarding adverse  
89 effects, such as infection and delayed wound-healing[6]. Understanding how these inflammatory  
90 responses impact pain outcomes is therefore important to know which cytokines may promote  
91 healing and which ones are associated with harmful pain.

92 Cytokines, as pivotal regulators of immune and inflammatory processes, have emerged as  
93 key players in the modulation of pain pathways.[7] Cytokines are soluble molecular substances  
94 produced by inflammatory cells. Broadly, they can be either pro-inflammatory (e.g., interleukins  
95 (IL)-1, 2, 8, 12; tumor necrosis factor  $\alpha$  (TNF $\alpha$ ), interferon  $\gamma$  (IFN $\gamma$ )) or anti-inflammatory (e.g.  
96 IL-4, IL-10, IL-13, transforming growth factor beta (TGF $\beta$ )), while some such as IL-6 can be  
97 both pro- and anti-inflammatory. Pro-inflammatory cytokines may be associated with  
98 postoperative pain after musculoskeletal surgeries [8] and may activate neural circuits to  
99 maintain hyperalgesia states [9]. Certain inflammatory profiles in the serum and body fluids have  
100 been suggested to be characteristic of poorly resolving pain after joint surgery [10]. However,

101 other studies have refuted these findings and did not find associations between perioperative  
102 cytokine concentrations with postoperative pain following total knee arthroplasty [11]. Thus,  
103 there is a lack of understanding of the role of cytokines in acute and chronic postoperative pain.  
104 This is crucial for developing targeted and effective pain management strategies, as a precise  
105 understanding of the cytokine response to surgical trauma may inform interventions that would  
106 optimize perioperative care, decrease morbidity and enhance recovery.

107 In this study, we aimed to investigate whether baseline cytokine profiles and longitudinal  
108 concentration changes in cytokines after surgery predicted acute and chronic postoperative pain  
109 outcomes. We hypothesized pro-inflammatory cytokines such as interferon gamma interferon  
110 (IFN $\gamma$ ), IL1 $\beta$ , IL2, IL8, and TNF- $\alpha$  will be associated with increased risk, while anti-  
111 inflammatory cytokines such as IL4, IL10, and IL13 will decrease risk for poor pain outcomes  
112 after surgery.

## 113 2. Materials and Methods

114 This prospective, observational, longitudinal study was nested within a larger genomics  
115 study ([ClinicalTrials.gov](#) Identifier: NCT02998138, NCT01839461, NCT01731873) and was  
116 conducted at a university-affiliated quaternary children's hospital. The Cincinnati Children's  
117 Institutional Review Board approved the study. Results pertaining to psychosocial factors and  
118 epigenetic factors influencing CPSP have been previously published [3, 12, 13]. Written  
119 informed consent was obtained from parents and assent from children before enrollment, either  
120 on paper or electronically, through Research Electronic Data Capture (REDCap), a secure web  
121 application for building and managing online surveys and databases. This study adhered to the  
122 Reporting of Observational Studies in Epidemiology (STROBE) guidelines [14].

123

### 124 2.1 Participants

125 Healthy children aged 8 years and above, regardless of sex or race, were included if they  
126 had a diagnosis of idiopathic scoliosis/kyphosis or pectus excavatum, American Society of  
127 Anesthesiologists physical status  $\leq 2$  (mild systemic disease) and were scheduled for elective  
128 spine fusion or Nuss procedure. They were screened from operating room schedules and  
129 recruited if they satisfied inclusion/exclusion criteria. Exclusion criteria included a history of  
130 opioid use in the past six months, liver and renal disease, pregnant or breastfeeding females,  
131 developmental delay, cancer, and those not fluent in written and/or spoken English. Perioperative  
132 management included standardized surgery-specific anesthesia and multimodal pain protocols.  
133 Patients undergoing either surgery received acetaminophen and ketorolac (on postoperative day  
134 (POD)0-2), dexamethasone (intraoperative only), muscle relaxants and opioids. Pectus patients  
135 also received regional anesthesia, methadone and pregabalin.

## 136 2.2 Data collection

137 Data were collected by chart review and via questionnaires administered through  
138 REDCap via email. Before surgery, the following data were collected: demographics (sex, age,  
139 race), weight, pain scores (numerical rating scale (NRS) 0-10)[15], diagnosis and surgery type.  
140 The Pediatric Pain Screening Tool (PPST) was administered preoperatively – a brief, 9-item self-  
141 report questionnaire developed for rapid identification of risk for poor pain coping. It has been  
142 validated in patients with chronic pain and within this surgical cohort for CPSP risk stratification  
143 [12, 16]. The first four items evaluate physical symptoms, and the next four questions evaluate  
144 psychosocial constructs. PPST total scores range from 0 to 9. Perioperative data collected  
145 included duration of surgery, pain scores (recorded every four hours) and analgesia (opioid  
146 medications/doses, (intravenous, oral and patient-controlled analgesia) over 48 hours after  
147 surgery. After hospital discharge, questionnaires were administered via REDCap 3-6 and 10–12  
148 months after surgery to obtain pain measures (average and maximum pain scores over the last  
149 week).

150

### 151 2.2.1 Blood draws

152 Blood was collected from intravenous catheters placed for clinical purposes and /or  
153 indwelling lines. An 8 ml sample was collected in purple top/EDTA tubes at baseline. Additional  
154 samples (1-2 ml) were collected at the scheduled time-points (**Figure 1**). The total amount of  
155 blood drawn per patient was approximately 30 ml. Whole blood samples were centrifuged at  
156 3500 rpm for 10 minutes, plasma aliquoted into two tubes (minimal volume per freezer aliquot  
157 tube: 250 microliters) and stored at -80°C until analysis.

## 158 2.2.2 Postoperative pain outcomes

159 Acute postsurgical pain was defined as a log-transformed compositional outcome of %  
160 time spent in moderate – severe pain (NRS>3/10) over POD0-2. Based on area under curve for  
161 repeat pain scores measured over POD0-2, % time for which pain scores were>3/10 was  
162 calculated. Log-ratio transformation was applied as defined as:  $f = \log(\text{average of \% time spent}$   
163  $\text{in moderate or severe pain over POD0-2} / \text{average of \% time spent in mild pain over POD0-2})$ .

164

165 CPSP was defined as any pain (NRS>3/10) beyond 3 months post-surgery. NRS cut-offs  
166 of 3/10 depict moderate/severe pain, are associated with functional disability, and have been  
167 described as a predictor for the persistence of pain [17].

168

## 169 2.3 Cytokine analyses

170 Cytokine levels were assayed using the Luminex multiplex (Milliplex) immunoassay  
171 bead array technology. Kits from R&D Systems (LXSAHM-12) analyzed chemokine CCL22,  
172 epidermal growth factor (EGF), fractalkine, IFN $\gamma$ , IL-1 receptor antagonist (IL-1ra), IL-2, IL-4,  
173 IL-6, IL-8, IL-10, IL-13, and TNF $\alpha$  levels; and Millipore Sigma (HSTCMAG28PMX13BK)  
174 analyzed granulocyte-macrophage colony-stimulating factor (GM-CSF), IFN $\gamma$ , IL-1 $\beta$ , IL-2, IL-4,  
175 IL-5, IL-6, IL-7, IL-8, IL-10, IL-12 (p70), IL-13 and TNF $\alpha$  levels and run according to the  
176 manufacturer's protocol. See supplemental figures for sensitivity and precision. Concentrations  
177 were calculated from standard curves using recombinant proteins and expressed in pg/ml using  
178 Bio-Plex Manager 6.2 (Bio-Rad Laboratories, Hercules, CA).

179



## 180 2.4 Statistical analyses

181 Fluorescence intensities were transferred into R (<http://www.r-project.org>) statistical  
182 software for converting into concentration values. Cytokine concentrations were determined  
183 from the standard serial dilutions, and standard curves were obtained from the Bayesian  
184 hierarchical 5-parameter logistic models created in the R package nCal [18]. Data cleaning and  
185 preparation for cytokine data included several steps (weighting, normality check and log  
186 transformation, winsorization, ComBat in R package sva for batch effect adjustment and  
187 handling of duplicates).

188 To test if baseline cytokines was associated with acute pain or CPSP, we first conducted  
189 an unadjusted analysis to determine if baseline cytokines were associated with acute pain and  
190 compared values between CPSP groups using t-tests (Pooled or Satterthwaite based on the test of  
191 equality of variances). We assessed the influence of covariates (age, biological sex, race, PPST,  
192 surgical duration, surgery type and morphine equivalents per kg (MEQ) or confounders  
193 (associated with both the independent variables and the outcomes). We then conducted multiple  
194 linear or logistic regression for the log-ratio transformed acute pain and CPSP outcomes,  
195 respectively, after eliminating collinear variables, and adjusting for covariates or confounders.

196 For testing if longitudinal cytokine concentration changes with time were associated with  
197 pain outcomes, we computed cytokine AUC for POD0, 1 and 2 (using cytokine concentration  
198 and time approximations based on blood draw timings), where cytokine AUC for POD0 was  
199 standardized to 24 hours. Cytokine AUCs were log-transformed before analysis. To evaluate the  
200 effect of changes in cytokine on acute pain outcome, mixed effects models with the acute pain as  
201 the dependent and log transformed cytokine AUC on POD0-2 as the independent variables were  
202 used. To evaluate the association between cytokine and CPSP, mixed effects models with log-

203 transformed cytokine AUC on POD0-2 as the outcome and binary CPSP as the independent  
204 variable were used. POD, sex, race, surgical duration, surgery type, and total MEQ were  
205 included as covariates and subjected to a random effect. We assessed for collinearity (or extreme  
206 confounding) for those variables associated with the outcomes based on tolerance, variance  
207 inflation factor (VIF) or generalized variance inflation factor (GVIF) for categorical variables.  
208 We eliminated correlated variables in both multiple regression and mixed effects models. Results  
209 from full models (supplementary material) and reduced models, where only covariates with  $p \leq$   
210 0.05 were retained, are presented.

211 **3. Results**

212 In all, 112 subjects were included in the study. Patient, surgical and outcome summary  
213 statistics are provided in **Table 1**. The majority of subjects were White (97.3%) and female  
214 (54.5%) and underwent pectus or spine surgeries under standardized anesthesia/pain protocols.  
215 The incidence of CPSP in this cohort was 43.9%, with loss of retention in five subjects. One of  
216 the cytokines, EGF, was excluded from the regression analysis because the reported  
217 concentrations had the same value across all time points.

218  
219 A total of 4230 cytokine concentration measures were initially included in the analyses.  
220 After data cleaning, the resulting number of observations was 3334. Details of data cleaning,  
221 tables of winsorized data, plots of before and after ComBat adjustment (**Supplementary Fig 1**)  
222 and cytokine data by CPSP over regrouped time points (**Supplementary Fig 2**) are presented in  
223 the supplementary materials. Finally, n=3249 concentrations from subjects who self-identified as  
224 belonging to White and Black race were included for association analyses due to the small  
225 number of subjects from other races.

226  
227 **3.1 Univariate associations between baseline cytokines with postoperative pain outcomes**

228 Using unadjusted model, a series of simple linear regressions showed higher acute pain  
229 associated with GM-CSF ( $\beta=0.90$ , SE 0.33,  $p=.008$ ), IL-2 ( $\beta=0.79$ , SE 0.35,  $p=.03$ ), and IL-12  
230 p70 ( $\beta=0.92$ , SE 0.43,  $p=.04$ ) concentrations at baseline (**Table S1**). Comparison of baseline  
231 cytokines between CPSP and controls showed differences only for CCL22 (CPSP  $5.90 \pm 0.52$   
232 pg/ml vs. control  $6.51 \pm 0.40$ );  $p=.004$ ) (**Table S2**).

233

### 234 3.2 Multivariate adjusted analyses: Baseline cytokines and pain outcomes

235 Biological sex, and surgery type were associated with CPSP, while MEQ was associated  
236 with acute pain outcomes ( $p < .05$ ). Participant's sex was also associated with IL-2 and MEQ with  
237 IL-8 levels (acted as confounders). Thus, in models adjusted for sex, MEQ, and surgery type, a  
238 series of analyses were conducted to evaluate the association of baseline cytokines with CPSP  
239 and acute pain (**Table S3**). Baseline cytokine concentrations were associated with acute pain for  
240 GM-CSF ( $\beta=0.95$ , SE 0.31;  $p=.003$ ), IL-1 $\beta$  ( $\beta=0.84$ , SE 0.36;  $p=.02$ ), IL-2 ( $\beta=0.78$ , SE 0.34;  
241  $p=.03$ ), and IL-12 p70 ( $\beta=0.88$ , SE 0.40;  $p=.03$ ), after controlling for relevant covariates and  
242 confounders (**Table 2**). In general, greater cytokine concentration levels were associated with  
243 with higher MEQ ( $p < .001$ ). After controlling for relevant covariates and confounders, baseline  
244 cytokine concentrations were associated with CPSP for IL-8 ( $\beta= -0.39$ , SE 0.17;  $p=.02$ ) (**Table**  
245 **3**). Baseline concentrations were associated with increased odds for CPSP in female (vs. male)  
246 sex (IL-2, IL-4, IL-5, IL-6, IL-8, IL-10, and TNF $\alpha$ ) and pectus (vs. spine) surgery patients (IL-8,  
247 IL-10).

248

### 249 3.2 Mixed effects model: Association of cytokine concentrations over time with acute pain 250 outcome

251 Mixed effects models were also adjusted for surgical duration/type, MEQ, sex, and race.  
252 In the full model, log cytokine AUC was associated with acute pain in GM-CSF ( $\beta=1.38$ , SE  
253 0.57;  $p=.03$ ), IFN $\gamma$  ( $\beta=1.36$ , SE 0.6;  $p=.03$ ), IL-1 $\beta$  ( $\beta=1.25$ , SE 0.59;  $p=.03$ ), IL-7 ( $\beta=1.65$ , SE  
254 0.7;  $p=.02$ ), and IL-12 p70 ( $\beta=1.17$ , SE 0.58;  $p=.04$ ) (**Table 4**). POD, surgery type/duration and  
255 MEQ were adjusted in several cytokine-acute pain association models (**Table S4**). The final  
256 reduced multiple regression model revealed associations with GM-CSF, IFN $\gamma$ , IL-1 $\beta$ , IL-5, IL-7,

257 and IL-12 p70 ( $p < .05$ ) after adjusting for surgical duration (**Table 4**). Estimates for an  
258 association of covariates were positive except for POD2, indicating decreasing acute pain over  
259 POD2.

260

261 3.4 Mixed effects model: Association of longitudinal cytokine concentrations and CPSP

262

263 Line chart of cytokine concentrations over time are provided in **Fig S2**, and the full  
264 model is in **Table S5**. CPSP was significantly associated with log cytokine AUC for IL-6 ( $\beta = -$   
265  $0.57$ , SE  $0.26$ ;  $p = .03$ ), IL-8 ( $\beta = -0.68$ , SE  $0.24$ ;  $p = .006$ ), and IL-13 ( $\beta = -0.48$ , SE  $0.22$ ;  $p = .03$ )  
266 (**Table 4**). Postoperative day and surgical duration were adjusted in the reduced model. Estimates  
267 for association with log cytokine AUC were negative for pectus surgery and Black race and  
268 positive for POD (POD1 and POD2) and MEQ. (**Table S5**)

#### 269 4. Discussion

270 In this prospective study of adolescents undergoing pectus or spine deformity correction  
271 surgery, cytokines were assayed from blood samples collected preoperatively and over six time  
272 points over POD0-2 and week 2 after surgery. The aims were to determine associations of  
273 baseline and longitudinal cytokine changes over POD0-2 with acute and chronic postoperative  
274 pain, adjusted for other covariates. We identified POD, sex, MEQ and surgery type/duration as  
275 covariates, as these were associated with cytokine and pain outcomes. Multivariate regression  
276 models revealed that higher baseline (i.e., preoperative) levels of GM-CSF, IL-1 $\beta$ , IL-2, and IL-  
277 12 p70 concentrations were associated with acute pain (i.e., % time in moderate-severe pain after  
278 surgery) while higher levels of baseline IL-8 decreased the odds for CPSP. Mixed effects models  
279 demonstrated that longitudinal postoperative cytokine concentrations of IL-6, IL-8, and IL-13  
280 were protective for CPSP (i.e. increased concentration decreased odds of developing CPSP),  
281 while higher longitudinal postoperative concentrations of GM-CSF, IFN $\gamma$ , IL-1 $\beta$ , IL-7, and IL-12  
282 p70 were associated with higher acute pain. Collectively, our data identified distinct cytokine  
283 signatures that are associated with differential outcomes for acute and chronic postsurgical pain.  
284 Severity of acute pain was predicted by elevations of mostly pro-inflammatory, chemotactic, and  
285 proliferative cytokines, while likelihood of developing chronic pain was associated with baseline  
286 and postoperative elevations of IL-6, IL-8, and IL-13, which suggest a pain-resolving mechanism  
287 associated with these immune mediators.

288 The immediate postoperative period is characterized by an orchestrated release of  
289 cytokines in response to surgical trauma. We found that baseline or overall AUC of GM-CSF,  
290 IFN $\gamma$ , IL-1 $\beta$ , IL-2, IL-7, and IL-12 p70 were higher with % time in moderate-severe pain on  
291 POD0-2. Several of these cytokines are known to be pro-inflammatory; some are secreted by T

292 helper cells and lead to the growth/differentiation of monocytes (GM-CSF) and proliferation of B  
293 cells, T cells, and natural killer (NK) cells (IL-2, IL-7). In contrast, others are released by  
294 macrophages and act on NK cells (IL-12 p70) and lead to IFN $\gamma$  release, which activates  
295 macrophages, neutrophils and NK cells and promotes cell-mediated immunity. IL-6 and TNF $\alpha$   
296 have also been implicated in sensitizing pain pathways and amplifying nociceptive signals[7].  
297 However, our study did not find them to be associated with pain outcomes. This aligns with other  
298 studies in adults. After hip arthroplasty serial IL-6 concentrations on POD1 were found to predict  
299 disability but not pain on discharge [19]. , or long-term disability at one and six months after  
300 surgery. Another study evaluating preoperative IL-6 and TNF $\alpha$  did not predict early pain or  
301 function after total hip arthroplasty [20]. These conflicting reports suggest that individual  
302 cytokine concentrations are not uniformly predictive of pain outcomes, and further work is  
303 required to uncover specific determinants of inflammatory responses in the postoperative period.

304 Traditionally, cytokines such as IL-1 receptor antagonist, IL-4, IL-10, IL-11, and IL-13  
305 are considered anti-inflammatory. Low blood levels of IL-4 and IL-10 were reported to be  
306 associated with chronic widespread pain [21]. However, we did not find associations between IL-  
307 4 or IL-10 with CPSP. We did find IL-13 to be protective for CPSP. IL-13 (and IL-4) belong to  
308 the T helper 2 (Th2) cytokine family and have been shown to play a role in downmodulating  
309 inflammatory responses in rheumatoid arthritis, induce macrophage polarization from a pro-  
310 inflammatory M1 to an anti-inflammatory M2 phenotype [22]. Studies in mice have shown that  
311 IL-13 released from T cells can polarize macrophages into an M2-like phenotype, and the  
312 resulting production of anti-inflammatory cytokines from these polarized macrophages was  
313 found to be critical for the resolution of chemotherapy-induced peripheral neuropathy.[23]. IL-13  
314 signaling uses the JAK-signal transducer and activator of the transcription (STAT) pathway,

315 specifically STAT6 [24], and these pathways may be future intervention targets. We also found  
316 baseline IL-8 and postoperative IL-8 AUC over POD0-2 to be protective for CPSP. However,  
317 this is not aligned with its known pro-inflammatory role and its association with pain in other  
318 studies [25]. Instead, our data support the notion that IL-8 may promote the recruitment or  
319 expansion of endogenous pain-resolving immune cells [add citations]. In support of this, patients  
320 with transcriptional responses associated with acute neutrophil activation after injury were less  
321 likely to transition from acute to chronic lower back pain[26]. Furthermore, female sex remained  
322 a significant factor associated with higher CPSP in these models. Our findings are aligned with  
323 those of a study of inflammatory markers in chronic pelvic pain patients. They reported IL-8 was  
324 protective with a sex-specific effect: women with pelvic pain showed a negative relationship  
325 between IL-8 and widespread pain, while men did not [27]. Female sex was also a covariate for  
326 AUC cytokine associations with CPSP for IL-4, IL-6, IL-8, and IL-13 cytokines. In an  
327 experimental study of sex effects on lipopolysaccharide (LPS) induced immune activation,  
328 visceral and musculoskeletal hyperalgesia was found to occur in both men and women,  
329 irrespective of biological sex. However, the LPS-induced cytokine increases in women were  
330 more pronounced [28]. Thus, future studies should investigate sex-cytokine interactions in pain  
331 as a biological mechanism for sex differences in pain.

332

333 We identified postsurgical time-dependent changes in cytokine levels with increased  
334 cytokine levels on POD1 followed by a decline on POD2. This is similar to the results of another  
335 study in 11 patients which found that five cytokines (IL-4, IL-6, IL-10, IL-12 p70 and IL-13) in  
336 plasma and ten cytokines in the cerebrospinal fluid (CSF) (IFN $\gamma$ , IL-1 $\beta$ , IL-2, IL-4, IL-6, IL-8,  
337 IL-10, IL-12 p70, IL-13, and TNF $\alpha$ ) rose significantly following femoral neck surgery [29].



338 However, the study did not report associations with clinical pain. Interestingly,  
339 neuroinflammatory responses (in CSF) were not shown to correlate with plasma levels. This is  
340 surprising as postsurgical studies in elderly patients found plasma TNF $\alpha$ , IL-6, and IL-10 levels  
341 to be independent predictors for adverse central postoperative outcomes such as cognitive  
342 deficits [30]. Future studies need to understand better the correlation of neuroinflammatory  
343 markers in clinical pain cohorts.

344 Surgery type (pectus vs spine) was associated with IL-8 and IL-10 at baseline in CPSP  
345 and acute pain association models. Prior research has shown similar differences with IL-6  
346 increases with more major surgery (aortic vs. hernia surgery) and in those with complications  
347 (N=3) [31] Opioid consumption was identified as a covariate for the association of baseline  
348 cytokine as well as cytokine exposure (AUC) for several cytokines (GM-CSF, IL-1 $\beta$ , IL-2-8, IL-  
349 10, IL-12 p70, IL-13, TNF $\alpha$ ) with acute pain, even when surgery type and duration were adjusted  
350 for in the models.

351

352 Our findings support the hypothesis that pro-inflammatory antagonists or anti-  
353 inflammatory agents could attenuate acute and chronic postsurgical pain. Our results predict that  
354 pharmacological or immunomodulatory approaches to broadly inhibit circulating pro-  
355 inflammatory cytokines would improve outcomes associated with acute pain, while interventions  
356 to elevate IL-6, IL-8, and IL-13 in the immediate postoperative period could prevent the  
357 transition from acute to chronic pain. Although it remains an ongoing challenge to suppress pain-  
358 promoting inflammation while promoting pain-resolving immune responses, there is evidence  
359 that immunotherapies may improve the treatment of ongoing pain[32, 33]. For example, anti-  
360 TNF $\alpha$  agents such as etanercept have found promise in inflammatory conditions such as

361 rheumatoid arthritis [34]. Recently, IL-13 administration in mice was found to reverse  
362 inflammatory macrophage-dependent neuropathic pain *via* a phenotype shift toward suppressive  
363 macrophages [35]. Our results add to the evolving understanding of cytokine involvement in  
364 postoperative pain, supporting emerging strategies targeting cytokine signaling to alleviate  
365 postoperative pain in children. Of note, multimodal analgesia components such as intravenous  
366 lidocaine and dexamethasone have been investigated for their anti-inflammatory effects and  
367 potential analgesic benefits after major musculoskeletal surgeries such as spine fusion, with  
368 mixed evidence regarding their benefits [36, 37].

369

#### 370 4.1 Limitations

371 One limitation of our study is that we did not adjust statistical significance for multiple  
372 tests. Despite this, to our knowledge, this might be the first study of longitudinal cytokines in  
373 relation to acute and chronic post-surgical pain in a well characterized, prospective, pediatric  
374 cohort. Moreover, the generalization over two surgeries makes our findings generalizable. Also,  
375 although the data was analyzed in different batches, we used high rigor in normalizing and  
376 analyzing the cytokine data. Despite the study's observational nature, spine and pectus surgical  
377 patients received standardized protocols, minimizing differences in pain management regimens.

378

#### 379 4.2 Conclusions

380 In conclusion, this paper describes the association between cytokines and acute and  
381 chronic postoperative pain in pediatric patients. Cytokine measurements perioperatively may not  
382 only serve as biomarkers and enable prediction of pain-related risk but also suggest potential

383 tailored interventions, thus paving the way for more personalized and effective pain management  
384 in the pediatric surgical setting. Future studies need to elucidate sex interactions with immune  
385 signaling and surgery-specific differences.

386

### 387 **Acknowledgments**

388 The authors gratefully acknowledge Maria E Ashton, MS, RPh, MBA, Medical Writer,  
389 Department of Anesthesiology, Cincinnati Children's Hospital Medical Center, for providing  
390 writing assistance, editing, and proofreading.

391 **References**

- 392 [1] Lee CS, Merchant S, Chidambaran V. Postoperative Pain Management in Pediatric Spinal Fusion  
393 Surgery for Idiopathic Scoliosis. *Paediatr Drugs*. 2020;22:575-601.
- 394 [2] Rabbitts JA, Fisher E, Rosenbloom BN, Palermo TM. Prevalence and Predictors of Chronic Postsurgical  
395 Pain in Children: A Systematic Review and Meta-Analysis. *J Pain*. 2017;18:605-14.
- 396 [3] Chidambaran V, Ding L, Moore DL, Spruance K, Cudilo EM, Pilipenko V, et al. Predicting the pain  
397 continuum after adolescent idiopathic scoliosis surgery: A prospective cohort study. *Eur J Pain*.  
398 2017;21:1252-65.
- 399 [4] Weledji EP. The role of cytokines in enhanced recovery after surgery. *IJS Short Reports*. 2021;6.
- 400 [5] Hsing C-H, Wang J-J. Clinical implication of perioperative inflammatory cytokine alteration. *Acta*  
401 *Anaesthesiologica Taiwanica*. 2015;53:23-8.
- 402 [6] Bosch DJ, Nieuwenhuijs-Moeke GJ, van Meurs M, Abdulahad WH, Struys M. Immune Modulatory  
403 Effects of Nonsteroidal Anti-inflammatory Drugs in the Perioperative Period and Their Consequence on  
404 Postoperative Outcome. *Anesthesiology*. 2022;136:843-60.
- 405 [7] Grace PM, Hutchinson MR, Maier SF, Watkins LR. Pathological pain and the neuroimmune interface.  
406 *Nat Rev Immunol*. 2014;14:217-31.
- 407 [8] Si HB, Yang TM, Zeng Y, Zhou ZK, Pei FX, Lu YR, et al. Correlations between inflammatory cytokines,  
408 muscle damage markers and acute postoperative pain following primary total knee arthroplasty. *BMC*  
409 *Musculoskelet Disord*. 2017;18:265.
- 410 [9] Watkins LR, Maier SF, Goehler LE. Immune activation: the role of pro-inflammatory cytokines in  
411 inflammation, illness responses and pathological pain states. *Pain*. 1995;63:289-302.
- 412 [10] Gandhi R, Santone D, Takahashi M, Dessouki O, Mahomed NN. Inflammatory predictors of ongoing  
413 pain 2 years following knee replacement surgery. *Knee*. 2013;20:316-8.
- 414 [11] Azim S, Nicholson J, Rebecchi MJ, Galbavy W, Feng T, Rizwan S, et al. Interleukin-6 and leptin levels  
415 are associated with preoperative pain severity in patients with osteoarthritis but not with acute pain  
416 after total knee arthroplasty. *Knee*. 2018;25:25-33.
- 417 [12] Narayanasamy S, Yang F, Ding L, Geisler K, Glynn S, Ganesh A, et al. Pediatric Pain Screening Tool: A  
418 Simple 9-Item Questionnaire Predicts Functional and Chronic Postsurgical Pain Outcomes After Major  
419 Musculoskeletal Surgeries. *J Pain*. 2022;23:98-111.
- 420 [13] Chidambaran V, Zhang X, Geisler K, Stubbeman BL, Chen X, Weirauch MT, et al. Enrichment of  
421 Genomic Pathways Based on Differential DNA Methylation Associated With Chronic Postsurgical Pain and  
422 Anxiety in Children: A Prospective, Pilot Study. *J Pain*. 2019;20:771-85.
- 423 [14] Vandenberg JP, von Elm E, Altman DG, Gotzsche PC, Mulrow CD, Pocock SJ, et al. Strengthening  
424 the Reporting of Observational Studies in Epidemiology (STROBE): explanation and elaboration.  
425 *Epidemiology*. 2007;18:805-35.
- 426 [15] von Baeyer CL. Numerical rating scale for self-report of pain intensity in children and adolescents:  
427 recent progress and further questions. *Eur J Pain*. 2009;13:1005-7.
- 428 [16] Simons LE, Smith A, Ibagon C, Coakley R, Logan DE, Schechter N, et al. Pediatric Pain Screening Tool:  
429 rapid identification of risk in youth with pain complaints. *Pain*. 2015;156:1511-8.
- 430 [17] Gerbershagen HJ, Rothaug J, Kalkman CJ, Meissner W. Determination of moderate-to-severe  
431 postoperative pain on the numeric rating scale: a cut-off point analysis applying four different methods.  
432 *Br J Anaesth*. 2011;107:619-26.
- 433 [18] Fong Y, Sebestyen K, Yu X, Gilbert P, Self S. nCal: an R package for non-linear calibration.  
434 *Bioinformatics*. 2013;29:2653-4.
- 435 [19] Hall GM, Peerbhoy D, Shenkin A, Parker CJ, Salmon P. Relationship of the functional recovery after  
436 hip arthroplasty to the neuroendocrine and inflammatory responses. *Br J Anaesth*. 2001;87:537-42.

- 437 [20] Poehling-Monaghan KL, Taunton MJ, Kamath AF, Trousdale RT, Sierra RJ, Pagnano MW. No  
438 Correlation Between Serum Markers and Early Functional Outcome After Contemporary THA. *Clin*  
439 *Orthop Relat Res*. 2017;475:452-62.
- 440 [21] Uçeyler N, Valenza R, Stock M, Schedel R, Sprotte G, Sommer C. Reduced levels of antiinflammatory  
441 cytokines in patients with chronic widespread pain. *Arthritis Rheum*. 2006;54:2656-64.
- 442 [22] Iwaszko M, Biały S, Bogunia-Kubik K. Significance of Interleukin (IL)-4 and IL-13 in Inflammatory  
443 Arthritis. *Cells*. 2021;10.
- 444 [23] Singh SK, Krukowski K, Laumet GO, Weis D, Alexander JF, Heijnen CJ, et al. CD8+ T cell-derived IL-13  
445 increases macrophage IL-10 to resolve neuropathic pain. *JCI Insight*. 2022;7.
- 446 [24] Takeda K, Kamanaka M, Tanaka T, Kishimoto T, Akira S. Impaired IL-13-mediated functions of  
447 macrophages in STAT6-deficient mice. *J Immunol*. 1996;157:3220-2.
- 448 [25] Hedderson WC, Borsa PA, Fillingim RB, Coombes SA, Hass CJ, George SZ. Plasma Concentrations of  
449 Select Inflammatory Cytokines Predicts Pain Intensity 48 Hours Post-Shoulder Muscle Injury. *Clin J Pain*.  
450 2020;36:775-81.
- 451 [26] Parisien M, Lima LV, Dagostino C, El-Hachem N, Drury GL, Grant AV, et al. Acute inflammatory  
452 response via neutrophil activation protects against the development of chronic pain. *Sci Transl Med*.  
453 2022;14:eabj9954.
- 454 [27] Karshikoff B, Martucci KT, Mackey S. Relationship Between Blood Cytokine Levels, Psychological  
455 Comorbidity, and Widespreadness of Pain in Chronic Pelvic Pain. *Frontiers in Psychiatry*. 2021;12.
- 456 [28] Wegner A, Elsenbruch S, Rebernik L, Roderigo T, Engelbrecht E, Jäger M, et al. Inflammation-induced  
457 pain sensitization in men and women: does sex matter in experimental endotoxemia? *Pain*.  
458 2015;156:1954-64.
- 459 [29] Fertleman M, Pereira C, Dani M, Harris BHL, Di Giovannantonio M, Taylor-Robinson SD. Cytokine  
460 changes in cerebrospinal fluid and plasma after emergency orthopaedic surgery. *Scientific Reports*.  
461 2022;12:2221.
- 462 [30] Sun T, Wang X, Liu Z, Chen X, Zhang J. Plasma concentrations of pro- and anti-inflammatory  
463 cytokines and outcome prediction in elderly hip fracture patients. *Injury*. 2011;42:707-13.
- 464 [31] Baigrie RJ, Lamont PM, Kwiatkowski D, Dallman MJ, Morris PJ. Systemic cytokine response after  
465 major surgery. *Br J Surg*. 1992;79:757-60.
- 466 [32] Kavelaars A, Heijnen CJ. Immune regulation of pain: Friend and foe. *Sci Transl Med*.  
467 2021;13:eabj7152.
- 468 [33] Fiore NT, Debs SR, Hayes JP, Duffy SS, Moalem-Taylor G. Pain-resolving immune mechanisms in  
469 neuropathic pain. *Nat Rev Neurol*. 2023;19:199-220.
- 470 [34] Hung AL, Lim M, Doshi TL. Targeting cytokines for treatment of neuropathic pain. *Scandinavian*  
471 *Journal of Pain*. 2017;17:287-93.
- 472 [35] Kiguchi N, Sakaguchi H, Kadowaki Y, Saika F, Fukazawa Y, Matsuzaki S, et al. Peripheral administration  
473 of interleukin-13 reverses inflammatory macrophage and tactile allodynia in mice with partial sciatic  
474 nerve ligation. *Journal of Pharmacological Sciences*. 2017;133:53-6.
- 475 [36] Dewinter G, Moens P, Fieuws S, Vanaudenaerde B, Van de Velde M, Rex S. Systemic lidocaine fails to  
476 improve postoperative morphine consumption, postoperative recovery and quality of life in patients  
477 undergoing posterior spinal arthrodesis. A double-blind, randomized, placebo-controlled trial. *British*  
478 *Journal of Anaesthesia*. 2017;118:576-85.
- 479 [37] Farag E, Ghobrial M, Sessler DI, Dalton JE, Liu J, Lee JH, et al. Effect of Perioperative Intravenous  
480 Lidocaine Administration on Pain, Opioid Consumption, and Quality of Life after Complex Spine Surgery.  
481 *Anesthesiology*. 2013;119:932-40.

482

483 **Figure legends**

484 Figure 1: Timeline of blood draws in relation to surgery (marked by rectangle of different shade).

485 Samples are named alphabetically and sequentially. Some samples were combined and averaged

486 based on time of draw (BC and DE). \* indicates they were drawn only for spine surgery subjects.

487 # indicates they were drawn only for pectus surgery subjects, due to differences in protocols and

488 to gather more samples. POD: Postoperative day; PACU: Postoperative care unit.

489

490

491

492

493

494

495

496

497

498

499

500

501

502 Table 1: Characteristics of study participants (n=112) and variables

503

| Variable                    | Category | Mean (SD) or Median (IQR) (n=112) | Min, Max    | Missing (%) |
|-----------------------------|----------|-----------------------------------|-------------|-------------|
| Age                         |          | 15.3 (13.5, 17.0) [n=112]         | 9.2, 36.4   | 0 (0.0)     |
| Sex                         | Female   | 61 (54.5)                         |             | 0 (0.0)     |
|                             | Male     | 51 (45.5)                         |             |             |
| Race                        | Black    | 3 (2.7)                           |             | 0 (0.0)     |
|                             | White    | 109 (97.3)                        |             |             |
| Surgical duration (minutes) |          | 147.5 (90.5, 224.0) [n=112]       | 58.0, 383.0 | 0 (0.0)     |
| Surgery                     | pectus   | 67 (59.8)                         |             | 0 (0.0)     |
|                             | spine    | 45 (40.2)                         |             |             |
| PPST                        |          | 1.0 (0.0, 3.0) [n=77]             | 0.0, 9.0    | 35 (31.3)   |
| MEQ POD0-2                  |          | 1.0 (0.7, 1.4) [n=112]            | 0.1, 4.1    | 0 (0.0)     |
| CPSP                        | No       | 60 (56.1)                         |             | 5 (4.5)     |
|                             | Yes      | 47 (43.9)                         |             |             |
| Acute pain POD0-2           |          | 0.1 (-0.9, 1.2) [n=104]           | -8.5, 8.5   | 8 (7.1)     |

504 Note: Acute pain is presented as a: log transformed percentage time in moderate-severe pain : log(average  
505 % Time in mod/severe pain on POD0-2 / average %Time in mild pain POD0-2)

506 PPST: Pediatric Pain Screening Tool

507 MEQ: Morphine equivalents/kg; POD: Postoperative day

508 CPSP: Chronic postsurgical pain

509

510

511

512

513

514

515

516

517

518

519

520

521

522

523 Table 2: Regression analysis of cytokine log concentration levels at baseline and acute pain (log  
524 transformed pain AUC over POD0-1)

| Cytokine     | Parameter with Relevant Covariates    | Estimate | StdErr | p-value          |
|--------------|---------------------------------------|----------|--------|------------------|
| CCL22        | Log concentration                     | -1.65    | 1.33   | 0.225            |
| Fractalkine  | Log concentration                     | -1.89    | 2.30   | 0.419            |
|              | Covariate: Race (Black vs. White)     | 2.69     | 4.11   | 0.519            |
| GM-CSF       | Log concentration                     | 0.95     | 0.31   | <b>0.003</b>     |
|              | Covariate: MEQ, POD0-2                | 1.67     | 0.41   | <b>&lt;0.001</b> |
| IFN $\gamma$ | Log concentration                     | 0.43     | 0.43   | 0.315            |
|              | Covariate: MEQ, POD0-2                | 1.43     | 0.40   | <b>&lt;0.001</b> |
| IL-10        | Log concentration                     | 0.13     | 0.25   | 0.586            |
|              | Covariate: MEQ, POD0-2                | 1.93     | 0.50   | <b>&lt;0.001</b> |
|              | Covariate: Surgery (Pectus vs. Spine) | 0.61     | 0.61   | 0.318            |
| IL-12P70     | Log concentration                     | 0.88     | 0.40   | <b>0.031</b>     |
|              | Covariate: MEQ, POD0-2                | 1.58     | 0.41   | <b>&lt;0.001</b> |
| IL-13        | Log concentration                     | 0.11     | 0.21   | 0.602            |
|              | Covariate: MEQ, POD0-2                | 1.27     | 0.40   | <b>0.002</b>     |
| IL-1B        | Log concentration                     | 0.84     | 0.36   | <b>0.023</b>     |
|              | Covariate: MEQ, POD0-2                | 1.75     | 0.43   | <b>&lt;0.001</b> |
| IL-1ra       | Log concentration                     | -0.16    | 2.01   | 0.937            |
| IL-2         | Log concentration                     | 0.78     | 0.34   | <b>0.026</b>     |
|              | Covariate: Sex (Female)               | -0.55    | 0.53   | 0.303            |
|              | Covariate: MEQ, POD0-2                | 1.38     | 0.40   | <b>&lt;0.002</b> |
| IL-4         | Log concentration                     | -0.18    | 0.25   | 0.485            |
|              | Covariate: MEQ, POD0-2                | 1.04     | 0.35   | <b>0.004</b>     |
| IL-5         | Log concentration                     | 0.17     | 0.27   | 0.535            |
|              | Covariate: MEQ, POD0-2                | 1.51     | 0.41   | <b>&lt;0.001</b> |
| IL-7         | Log concentration                     | 0.50     | 0.46   | 0.276            |
|              | Covariate: MEQ, POD0-2                | 1.60     | 0.42   | <b>&lt;0.001</b> |
| IL-8         | Log concentration                     | 0.23     | 0.19   | 0.213            |
|              | Covariate: MEQ, POD0-2                | 1.39     | 0.42   | <b>0.001</b>     |
|              | Covariate: Surgery (Pectus)           | 0.44     | 0.57   | 0.439            |
| TNF $\alpha$ | Log concentration                     | 0.11     | 0.71   | 0.875            |
|              | Covariate: MEQ, POD0-2                | 1.07     | 0.36   | <b>0.004</b>     |

525 Significant p-values (<.05) bolded for covariates and cytokine associations, with those for cytokine  
526 associations are marked in red text. MEQ: Morphine equivalents/kg; POD: postoperative day

527

528

529



530 Table 3: Regression analysis of baseline cytokine concentrations with risk (Odds) of developing chronic  
 531 postsurgical pain (CPSP)

| <b>Cytokine</b> | <b>Parameter with relevant covariates</b> | <b>Odds Ratio (95% CI)</b> | <b>Estimate<br/><math>\beta</math></b> | <b>Std<br/>Error</b> | <b>P -value</b> |
|-----------------|-------------------------------------------|----------------------------|----------------------------------------|----------------------|-----------------|
| CCL22           | Log concentration                         | 0.20 (0.03 - 1.47)         | -1.62                                  | 1.02                 | 0.114           |
| Fractalkine     | Log concentration                         | 0.89 (0.09 - 8.71)         | -0.12                                  | 1.17                 | 0.918           |
| GM_CSF          | Log concentration                         | 1.35 (0.78 - 2.36)         | 0.30                                   | 0.28                 | 0.285           |
| GM_CSF          | Covariate: Sex (Female vs. Male)          | 2.25 (1.00 - 5.09)         | 0.41                                   | 0.21                 | 0.051           |
| IFN $\gamma$    | Log concentration                         | 1.29 (0.59 - 2.81)         | 0.25                                   | 0.40                 | 0.529           |
| IFN $\gamma$    | Covariate: Sex (Female vs. Male)          | 2.19 (0.97 - 4.94)         | 0.39                                   | 0.21                 | 0.059           |
| IL-10           | Log concentration                         | 0.78 (0.50 - 1.20)         | -0.25                                  | 0.22                 | 0.259           |
| IL-10           | Covariate: Sex (Female vs. Male)          | 4.27 (1.49 - 12.26)        | 0.73                                   | 0.27                 | <b>0.007</b>    |

532

|              |                                      |                     |       |      |              |
|--------------|--------------------------------------|---------------------|-------|------|--------------|
| IL-10        | Covariate: Surgery (pectus vs spine) | 3.55 (1.15 - 10.91) | 0.63  | 0.29 | <b>0.027</b> |
| IL-12P70     | Log concentration                    | 1.07 (0.54 - 2.15)  | 0.07  | 0.35 | 0.840        |
| IL-12P70     | Covariate: Sex (Female vs. Male)     | 2.23 (0.98 - 5.07)  | 0.40  | 0.21 | 0.055        |
| IL-13        | Log concentration                    | 0.79 (0.56 - 1.10)  | -0.24 | 0.17 | 0.158        |
| IL-13        | Covariate: Sex (Female vs. Male)     | 2.35 (1.03 - 5.36)  | 0.43  | 0.21 | <b>0.042</b> |
| IL-1B        | Log concentration                    | 1.29 (0.72 - 2.30)  | 0.25  | 0.30 | 0.396        |
| IL-1ra       | Log concentration                    | 0.48 (0.05 - 4.65)  | -0.74 | 1.16 | 0.525        |
| IL-2         | Log concentration                    | 1.23 (0.70 - 2.17)  | 0.21  | 0.29 | 0.468        |
| IL-2         | Covariate: Sex (Female vs. Male)     | 2.46 (1.07 - 5.66)  | 0.45  | 0.21 | <b>0.034</b> |
| IL-4         | Log concentration                    | 0.91 (0.59 - 1.39)  | -0.10 | 0.22 | 0.646        |
| IL-4         | Covariate: Sex (Female vs. Male)     | 2.63 (1.17 - 5.92)  | 0.48  | 0.21 | <b>0.020</b> |
| IL-5         | Log concentration                    | 0.84 (0.54 - 1.30)  | -0.17 | 0.22 | 0.438        |
| IL-5         | Covariate: Sex (Female vs. Male)     | 2.43 (1.07 - 5.55)  | 0.44  | 0.21 | <b>0.035</b> |
| IL-6         | Log concentration                    | 0.82 (0.63 - 1.06)  | -0.20 | 0.13 | 0.132        |
| IL-6         | Covariate: Sex (Female vs. Male)     | 3.09 (1.16 - 8.23)  | 0.56  | 0.25 | <b>0.024</b> |
| IL-7         | Log concentration                    | 1.20 (0.54 - 2.67)  | 0.18  | 0.41 | 0.655        |
| IL-7         | Covariate: Sex (Female vs. Male)     | 2.19 (0.96 - 4.99)  | 0.39  | 0.21 | 0.064        |
| IL-8         | Log concentration                    | 0.68 (0.48 - 0.95)  | -0.39 | 0.17 | <b>0.023</b> |
| IL-8         | Covariate: Sex (Female vs. Male)     | 6.13 (1.98 - 18.92) | 0.91  | 0.29 | <b>0.002</b> |
| IL-8         | Covariate: Surgery (pectus vs spine) | 5.53 (1.55 - 19.71) | 0.86  | 0.32 | <b>0.009</b> |
| IL-8         | Covariate: MEQ POD0-2                | 1.20 (0.58 - 2.45)  | 0.18  | 0.37 | 0.627        |
| TNF $\alpha$ | Log concentration                    | 0.66 (0.20 - 2.25)  | -0.41 | 0.62 | 0.510        |
| TNF $\alpha$ | Covariate: Sex (Female vs. Male)     | 2.45 (1.10 - 5.48)  | 0.45  | 0.21 | <b>0.029</b> |

533 Significant p-values (<.05) bolded for covariates and cytokine associations, with those for cytokine – pain  
 534 associations marked in red text. MEQ: Morphine equivalents/kg; POD: postoperative day

535

536

537

538

539

540

541 Table 4. Mixed effects model (reduced model) results for significant associations of pain  
 542 outcomes and covariates with cytokine concentrations over POD0-2, adjusted for surgical  
 543 duration.

| Dependent variable: Acute pain (Log transformed %time moderate-severe pain over POD0-2) |                                                             |                                                                    |
|-----------------------------------------------------------------------------------------|-------------------------------------------------------------|--------------------------------------------------------------------|
| Cytokine                                                                                | Outcome: Cytokine AUC over POD0-2<br>Estimate (SE); P-value | Covariate: MEQ POD0-2 association with log<br>cytokine AUC P-value |
| CCL22                                                                                   |                                                             |                                                                    |
| Fractalkine                                                                             |                                                             |                                                                    |
| GM_CSF                                                                                  | 1.38 (.57); .02                                             | -                                                                  |
| IFN $\gamma$                                                                            | 1.36 (.6); .03                                              | -                                                                  |
| IL-10                                                                                   |                                                             |                                                                    |
| IL-12P70                                                                                | 1.17 (.58); .04                                             | -                                                                  |

| IL-13                                                                                                       |                                      |                                                       |                   |      |      |       |
|-------------------------------------------------------------------------------------------------------------|--------------------------------------|-------------------------------------------------------|-------------------|------|------|-------|
| IL-1B                                                                                                       | 1.25 (.59); .03                      |                                                       |                   |      | .04  |       |
| IL-1ra                                                                                                      |                                      |                                                       |                   |      |      |       |
| IL-2                                                                                                        |                                      |                                                       |                   |      |      |       |
| IL-4                                                                                                        |                                      |                                                       |                   |      |      |       |
| IL-5                                                                                                        | -                                    |                                                       |                   |      | .03  |       |
| IL-6                                                                                                        |                                      |                                                       |                   |      |      |       |
| IL-7                                                                                                        | 1.65 (.7); .02                       |                                                       |                   |      | -    |       |
| IL-8                                                                                                        |                                      |                                                       |                   |      |      |       |
| TNF $\alpha$                                                                                                |                                      |                                                       |                   |      |      |       |
| <b>Dependent variable: Log Cytokine AUC over POD0-2; Association with chronic post-surgical pain (CPSP)</b> |                                      |                                                       |                   |      |      |       |
| Cytokine                                                                                                    | Outcome: CPSP Estimate (SE); P-value | P-values for Covariate associations with Cytokine AUC |                   |      |      |       |
|                                                                                                             |                                      | POD                                                   | Surgical duration | Sex  | Race | MEQ   |
| CCL22                                                                                                       |                                      |                                                       |                   |      | .04  |       |
| Fractalkine                                                                                                 |                                      |                                                       |                   |      |      |       |
| GM-CSF                                                                                                      |                                      | <.001                                                 |                   |      |      |       |
| IFN $\gamma$                                                                                                |                                      | <.001                                                 |                   |      |      | .008  |
| IL-10                                                                                                       |                                      | <.001                                                 | .04               | .02  |      |       |
| IL-12P70                                                                                                    |                                      | <.001                                                 |                   |      |      |       |
| IL-13                                                                                                       | -0.48 (0.22); .03                    | <.001                                                 |                   | .005 |      |       |
| IL-1B                                                                                                       |                                      | <.001                                                 |                   |      |      |       |
| IL-1ra                                                                                                      |                                      | <.001                                                 |                   |      |      |       |
| IL-2                                                                                                        |                                      | <.001                                                 |                   | .01  |      | <.001 |
| IL-4                                                                                                        |                                      | <.001                                                 |                   | .004 |      |       |
| IL-5                                                                                                        |                                      | <.001                                                 |                   | .04  |      |       |
| IL-6                                                                                                        | -0.57 (0.26); .03                    | <.001                                                 |                   | .003 |      |       |
| IL-7                                                                                                        |                                      | <.001                                                 | .004              |      |      |       |
| IL-8                                                                                                        | -0.68 (0.24); .006                   | <.001                                                 |                   | .004 |      |       |
| TNF $\alpha$                                                                                                |                                      | <.001                                                 | <.001             |      |      | .002  |

544

545

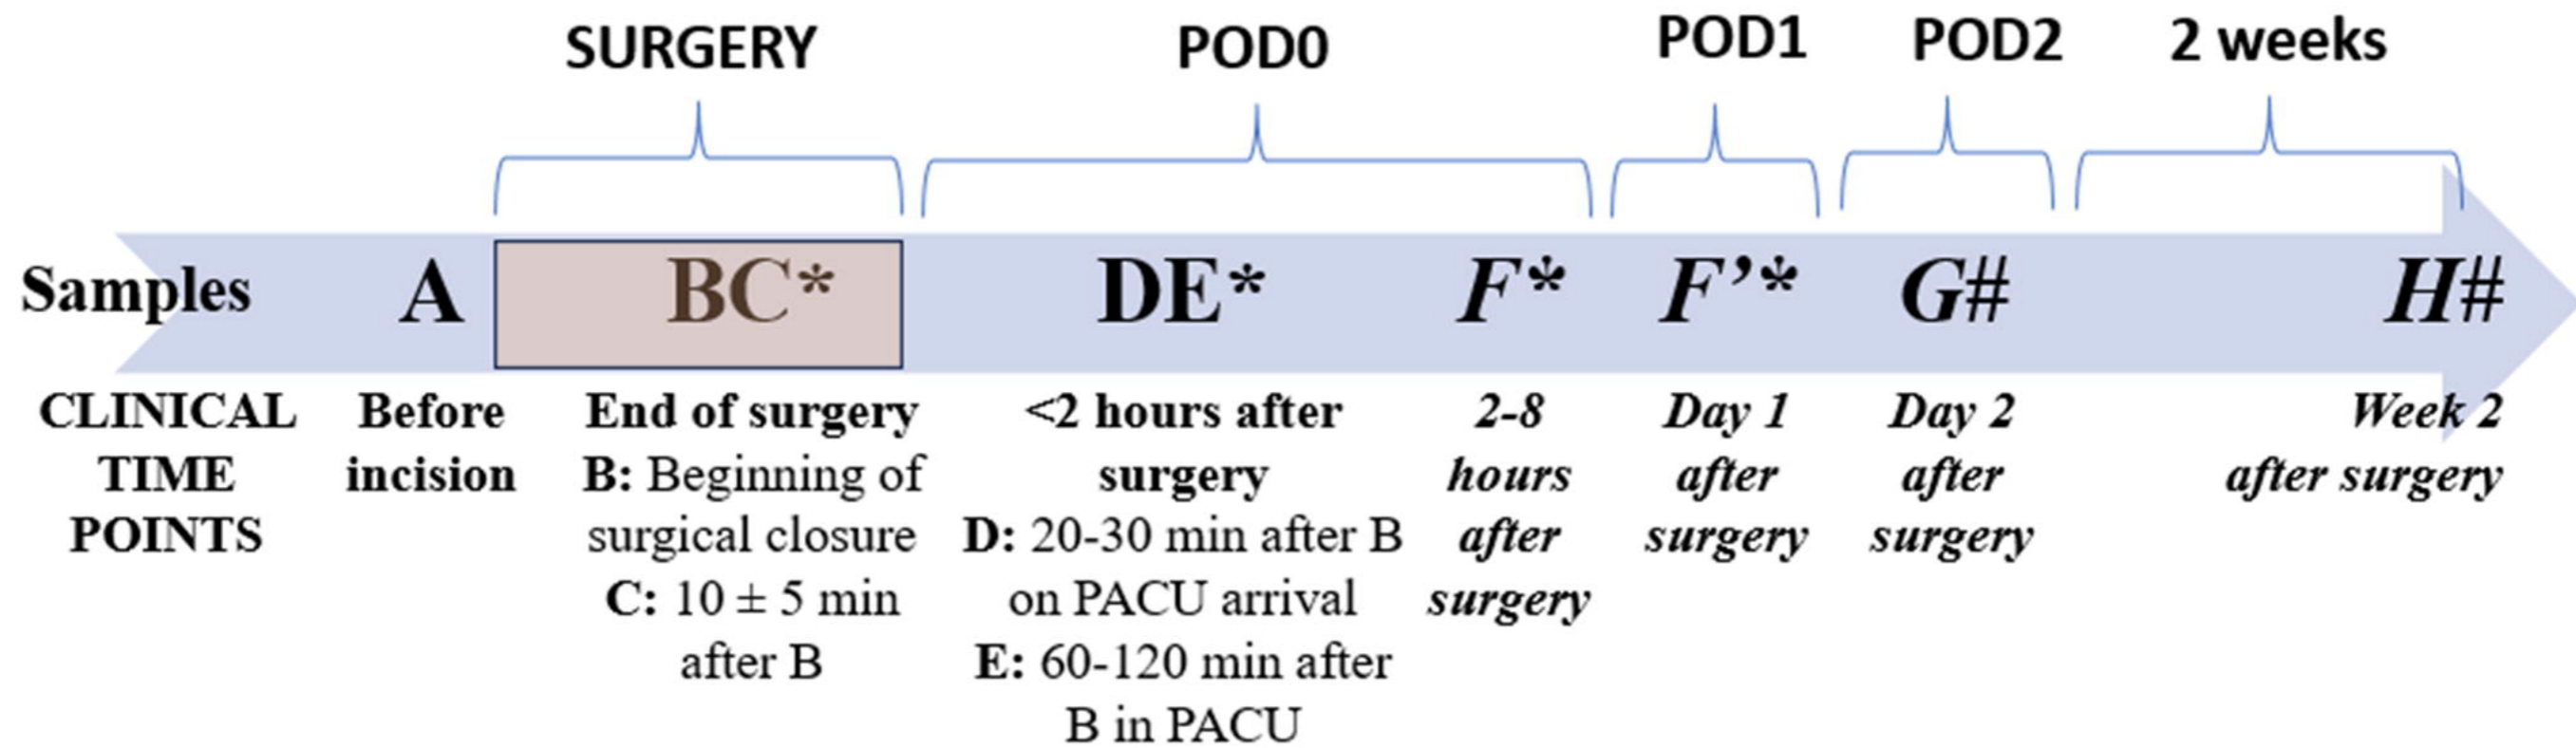

Source: https://www.medrxiv.org/content/10.1101/2024.03.27.24304974v1.full.pdf
